# Supplementary material for: The Protein Precursors of Peptides That Affect the Mechanics of Connective Tissue and/or Muscle in the Echinoderm Apostichopus japonicus
Source: PLoS One. 2012 Aug 31;7(8):e44492. doi: 10.1371/journal.pone.0044492 (PMC3432112; doi:10.1371/journal.pone.0044492)
Supplement: Figure S1 — Putative protein from which the peptide SWGSLA is derived. (PDF) [file pone.0044492.s001.pdf]

```

1                                     C
2  tcggtcaaaaactttcgccgcttccatcgaggacgaaattcttgacgcggatgcccttagt
   S V K T F A A S I E D E I L D A D A L S    20
62  cgccgcggcggatggtttcatagactgttccatcatcaccaccatggtgcaccagccgac
   R R G G W F H R L F H H H H G A P A D    40
122  aacaagaaccagccaaaacagagagaggaaagacaactcatacatgataacagagagaat
   N K N Q P K Q R E E R Q L I H D N R E N    60
182  gccatgctagatgacttcgagaagaaaaatggctgagttatctccagcggagcgttttgac
   A M L D D F E K K M A E L S P A E R F D    80
242  tggcatgctctcttacacagtgtcagtaaacatgttgctaaacacgttgacagagaactta
   W H A L L H S V S K H V A K H V A E N L    100
302  aaagcgagagtgttggccgaagaaggggagcgactgcccgagggatacgacgagctaaca
   K A R V L A E E G E R L P E G Y D E L T    120
362  cctgaagagagaagctggtatggctccctggcaagtgcactccttggtagatgaatactg
   P E E R S W Y G S L A S A L L G R *    137
422  cgggaaagaagcttgtatctgacccaaactgaccgatatttagtctatagacacccatcc
482  tatcaagtgaaatatttcccttgacttttagtattgtttcgatttcaagtaatggtggtg
542  gattgactttttggaataaaaaatcagaaaataaagtaagcacgatct

```

**Figure S1.**

Putative protein from which the peptide SWGSLA is derived. The sequence of isotig 11737 is shown (lowercase, 588 bases) with the partial sequence of the protein that it encodes shown underneath in bold uppercase (137 amino acid residues). The SWGSLA sequence is shown in red and the asterisk shows the position of the stop codon. Submission of this protein sequence as query in a BLAST search of the GenBank protein database reveals that it shares sequence similarity with proteins of bacterial origin (see text in results section).
